# Supplementary material for: IL20RB signaling enhances stemness and chemotherapy resistance in pancreatic cancer
Source: Springer Nature journal article supplement (doi:10.1186/s12967-023-04800-5), 2023-12-14
Supplement: MOESM2 [file 26528852]

# Additional file 1: Figure S1

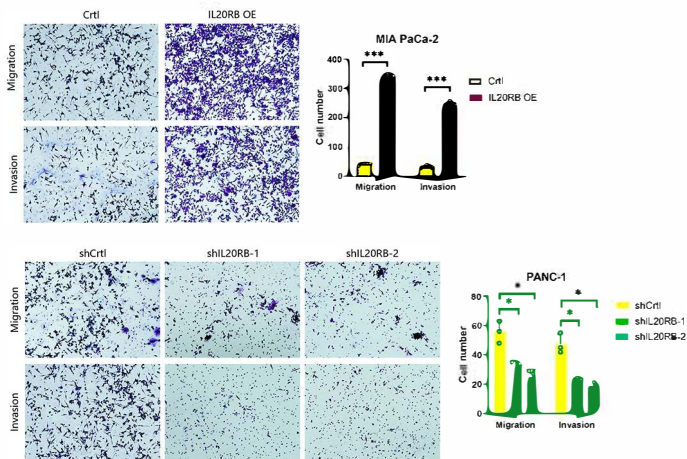

Supplementary Figure 1: IL20RB promotes pancreatic cancer invasiveness in vitro. Transwell assay and statistical analysis of PANC-1 and MIA PaCa-2 (n=3 / group).
